# Supplementary material for: A systematic review of the ecological, social and economic sustainability effects of community-supported agriculture
Source: Frontiers journal article supplement (doi:10.3389/fsufs.2023.1136866), 2023-05-16
Supplement: downloadfile [file 1136866]

## Supplementary Material

### 1 Supplementary Tables

**Supplementary Table 1.** Dataset generated during the literature review including the original variables regarding ecological, social and economic sustainability aspects extracted from the 39 publications considered.

**Supplementary Table 2.** Number of studies per year and underlying references.

| Year | Number of studies | References                                                                                                                                            |
|------|-------------------|-------------------------------------------------------------------------------------------------------------------------------------------------------|
| 2000 | 1                 | (Cone and Myhre, 2000)                                                                                                                                |
| 2005 | 1                 | (Lang, 2005)                                                                                                                                          |
| 2006 | 1                 | (Guthman et al., 2006)                                                                                                                                |
| 2008 | 1                 | (Russell and Zepeda, 2008)                                                                                                                            |
| 2009 | 1                 | (Hardesty and Leff, 2010; Galt et al., 2012)                                                                                                          |
| 2012 | 2                 | (Galt et al., 2012; MacMillan Uribe et al., 2012)                                                                                                     |
| 2014 | 3                 | (Farmer et al., 2014; Moellers and Birhalä, 2014; Obach and Tobin, 2014)                                                                              |
| 2015 | 1                 | (Wilkins et al., 2015)                                                                                                                                |
| 2017 | 4                 | (Allen et al., 2017; Carolan, 2017; Rossi et al., 2017; Vassalos et al., 2017)                                                                        |
| 2018 | 5                 | (Christensen et al., 2018; Izumi et al., 2018; Morgan et al., 2018; Pérez-Neira and Grollmus-Venegas, 2018; White et al., 2018)                       |
| 2019 | 7                 | (Chen et al., 2019; Galt et al., 2019; Jablonski et al., 2019; Matzembacher and Meira, 2019; Paul, 2019; Samoggia et al., 2019; Sitaker et al., 2019) |
| 2020 | 5                 | (Diekmann, 2020; Espelt, 2020; Fremstad and Paul, 2020; Mert-Cakal and Miele, 2020; Zhen et al., 2020)                                                |
| 2021 | 5                 | (Atakan and Yercan, 2021; Cristiano, 2021; Gugerell et al., 2021; Medici et al., 2021; Mills et al., 2021)                                            |
| 2022 | 1                 | (Hunter et al., 2022; Jilcott Pitts et al., 2022)                                                                                                     |

**Supplementary Table 3.** Number of studies per research area reported in Web of Science.

| Research area                               | Number of studies |
|---------------------------------------------|-------------------|
| Agriculture                                 | 14                |
| Environmental Sciences & Ecology            | 11                |
| Science & Technology - Other Topics         | 11                |
| Sociology                                   | 6                 |
| Nutrition & Dietetics                       | 4                 |
| Engineering                                 | 3                 |
| Geography                                   | 3                 |
| Business & Economics                        | 2                 |
| Food Science & Technology                   | 2                 |
| History & Philosophy of Science             | 2                 |
| Public Administration                       | 2                 |
| Public, Environmental & Occupational Health | 2                 |
| Social Sciences - Other Topics              | 2                 |
| Anthropology                                | 1                 |
| Behavioral Sciences                         | 1                 |
| Development Studies                         | 1                 |
| Education & Educational Research            | 1                 |
| General & Internal Medicine                 | 1                 |
| Physical Geography                          | 1                 |
| Urban Studies                               | 1                 |

**Supplementary Table 4.** Number of variables with positive, neutral, negative or unclear effects in each sub category.

| Dimension | Category     | Sub category             | Positive | Neutral | Negative | Unclear | CSA farms | Studies |
|-----------|--------------|--------------------------|----------|---------|----------|---------|-----------|---------|
| Ecology   | Soil         | Fertility                | 0        | 0       | 0        | 0       | 0         | 0       |
| Ecology   | Soil         | Erosion                  | 0        | 0       | 0        | 0       | 0         | 0       |
| Ecology   | Soil         | Density                  | 0        | 0       | 0        | 0       | 0         | 0       |
| Ecology   | Soil         | Climate                  | 0        | 0       | 0        | 0       | 0         | 0       |
| Ecology   | Inputs       | Water                    | 1        | 1       | 0        | 1       | 8         | 2       |
| Ecology   | Inputs       | Vehicles/machinery       | 5        | 1       | 2        | 11      | 112       | 8       |
| Ecology   | Inputs       | Electricity              | 0        | 1       | 0        | 2       | 7         | 3       |
| Ecology   | Inputs       | Pesticides               | 5        | 0       | 1        | 1       | 9         | 3       |
| Ecology   | Inputs       | Fertilizer               | 14       | 0       | 3        | 2       | 57        | 4       |
| Ecology   | Inputs       | Seeds                    | 1        | 0       | 0        | 2       | 2         | 2       |
| Ecology   | Inputs       | Seedlings                | 1        | 0       | 0        | 1       | 2         | 2       |
| Ecology   | Inputs       | Material/technology      | 0        | 2       | 0        | 4       | 2         | 2       |
| Ecology   | Inputs       | Energy                   | 7        | 0       | 0        | 2       | 57        | 4       |
| Ecology   | Outputs      | Climate                  | 4        | 1       | 0        | 9       | 17        | 4       |
| Ecology   | Outputs      | Production               | 0        | 0       | 0        | 3       | 25        | 3       |
| Ecology   | Outputs      | Environmental impact     | 1        | 0       | 0        | 0       | 7         | 1       |
| Ecology   | Outputs      | Energy                   | 4        | 2       | 0        | 0       | 1         | 1       |
| Ecology   | Biodiversity | Crop diversity           | 0        | 0       | 0        | 2       | 64        | 2       |
| Ecology   | Biodiversity | Plant diversity          | 0        | 0       | 0        | 0       | 0         | 0       |
| Ecology   | Biodiversity | Livestock diversity      | 0        | 0       | 0        | 1       | 48        | 1       |
| Ecology   | Biodiversity | Animal diversity         | 0        | 0       | 0        | 0       | 0         | 0       |
| Ecology   | Biodiversity | Land use                 | 0        | 0       | 0        | 0       | 0         | 0       |
| Social    | Team         | Knowledge/Learning       | 1        | 0       | 1        | 2       | 68        | 5       |
| Social    | Team         | Trust                    | 0        | 0       | 0        | 0       | 0         | 0       |
| Social    | Team         | Diversity/inclusion      | 0        | 0       | 1        | 8       | 83        | 2       |
| Social    | Team         | Fluctuation              | 0        | 0       | 0        | 0       | 0         | 0       |
| Social    | Team         | Income                   | 4        | 2       | 0        | 2       | 2110      | 5       |
| Social    | Team         | Satisfaction             | 4        | 0       | 0        | 1       | 23        | 3       |
| Social    | Team         | Full time/part time      | 0        | 0       | 0        | 4       | 59        | 4       |
| Social    | Team         | Buffer capacity          | 0        | 0       | 0        | 0       | 0         | 0       |
| Social    | Members      | Knowledge/Learning       | 4        | 2       | 0        | 0       | 8         | 3       |
| Social    | Members      | Trust                    | 0        | 0       | 0        | 0       | 0         | 0       |
| Social    | Members      | Diversity/inclusion      | 0        | 16      | 48       | 38      | 166       | 21      |
| Social    | Members      | Fluctuation              | 0        | 0       | 0        | 10      | 187       | 8       |
| Social    | Members      | Satisfaction             | 0        | 0       | 0        | 2       | 13        | 2       |
| Social    | Members      | Engagement               | 3        | 1       | 0        | 6       | 30        | 7       |
| Social    | Members      | Identification           | 1        | 1       | 0        | 1       | 16        | 3       |
| Social    | Members      | Distance                 | 0        | 0       | 0        | 1       | 5         | 1       |
| Social    | Members      | Supply                   | 1        | 0       | 0        | 3       | 13        | 4       |
| Social    | Members      | Behavior                 | 39       | 21      | 0        | 8       | 33        | 11      |
| Social    | Members      | Well-being/health        | 7        | 6       | 1        | 0       | 6         | 2       |
| Social    | Farm         | Transparency             | 0        | 0       | 0        | 1       | 19        | 1       |
| Social    | Farm         | Attractivity             | 0        | 0       | 0        | 0       | 0         | 0       |
| Social    | Farm         | Goals/visions/strategies | 0        | 0       | 0        | 1       | 19        | 1       |
| Social    | Farm         | Bidding                  | 0        | 0       | 0        | 0       | 0         | 0       |
| Social    | Farm         | Community building       | 1        | 0       | 1        | 1       | 10        | 3       |
| Social    | Surroundings | Cooperation              | 0        | 0       | 0        | 1       | 56        | 1       |
| Social    | Surroundings | Competition              | 0        | 0       | 0        | 0       | 0         | 0       |
| Social    | Surroundings | Rejection/Recognition    | 0        | 0       | 0        | 0       | 0         | 0       |
| Social    | Surroundings | Knowledge                | 0        | 0       | 0        | 4       | 56        | 1       |
| Economy   | Farm         | Products                 | 0        | 0       | 0        | 2       | 43        | 2       |
| Economy   | Farm         | Management               | 3        | 0       | 0        | 1       | 20        | 2       |
| Economy   | Farm         | Age                      | 0        | 0       | 0        | 9       | 174       | 9       |
| Economy   | Farm         | Distribution             | 0        | 0       | 0        | 3       | 48        | 3       |
| Economy   | Farm         | Marketing channels       | 2        | 1       | 0        | 1       | 46        | 3       |
| Economy   | Costs        | Labor                    | 0        | 0       | 0        | 0       | 0         | 0       |

|         |                     |                   |   |   |   |    |     |    |
|---------|---------------------|-------------------|---|---|---|----|-----|----|
| Economy | Costs               | Running costs     | 1 | 9 | 3 | 19 | 33  | 5  |
| Economy | Costs               | Investments       | 0 | 2 | 0 | 0  | 7   | 1  |
| Economy | Revenues            | Membership fees   | 1 | 0 | 1 | 9  | 152 | 10 |
| Economy | Revenues            | Donations         | 0 | 0 | 0 | 1  | 19  | 1  |
| Economy | Revenues            | Subsidies         | 0 | 0 | 0 | 1  | 4   | 1  |
| Economy | Revenues            | Projects          | 0 | 0 | 0 | 0  | 0   | 0  |
| Economy | Financial resources | Liquidity         | 0 | 1 | 0 | 1  | 37  | 2  |
| Economy | Financial resources | Equity ratio      | 0 | 0 | 0 | 0  | 0   | 0  |
| Economy | Financial resources | Balance           | 8 | 2 | 1 | 1  | 97  | 7  |
| Economy | Financial resources | Diversification   | 0 | 0 | 0 | 0  | 0   | 0  |
| Economy | Financial resources | Contract duration | 0 | 0 | 0 | 0  | 0   | 0  |
| Economy | Operating area      | Yard              | 0 | 0 | 0 | 0  | 0   | 0  |
| Economy | Operating area      | Operating area    | 0 | 0 | 0 | 11 | 166 | 10 |
| Economy | Operating area      | Farm size         | 0 | 0 | 0 | 0  | 0   | 0  |
| Economy | Range               | Shares            | 0 | 0 | 0 | 14 | 191 | 12 |
| Economy | Range               | Access            | 1 | 0 | 0 | 0  | 16  | 1  |
| Economy | Range               | Innovation        | 0 | 0 | 0 | 0  | 0   | 0  |
| Economy | Range               | Productivity      | 2 | 0 | 2 | 2  | 26  | 4  |

## 2 References

- Allen, J. E., Rossi, J., Woods, T. A., and Davis, A. F. (2017). Do Community Supported Agriculture programmes encourage change to food lifestyle behaviours and health outcomes? New evidence from shareholders. *International Journal of Agricultural Sustainability* 15, 70–82. doi: 10.1080/14735903.2016.1177866
- Atakan, P., and Yercan, M. (2021). Community supported agriculture as a domain of economic exchange: Models, social capital and performance of three community supported agriculture groups in Turkey. *New Medit* 20, 33–51. doi: 10.30682/nm2103c
- Carolan, M. (2017). More-than-Active Food Citizens: A Longitudinal and Comparative Study of Alternative and Conventional Eaters. *Rural Sociology* 82, 197–225. doi: 10.1111/ruso.12120
- Chen, J., Gao, Z., Chen, X., and Zhang, L. (2019). Factors Affecting the Dynamics of Community Supported Agriculture (CSA) Membership. *Sustainability* 11, 4170. doi: 10.3390/su11154170
- Christensen, L. O., Galt, R. E., and Kendall, A. (2018). Life-cycle greenhouse gas assessment of Community Supported Agriculture in California's Central Valley. *Renew. Agric. Food Syst.* 33, 393–405. doi: 10.1017/S1742170517000254
- Cone, C. A., and Myhre, A. (2000). Community-Supported Agriculture: A Sustainable Alternative to Industrial Agriculture? 59, 187–197.
- Cristiano, S. (2021). Organic vegetables from community-supported agriculture in Italy: Emergy assessment and potential for sustainable, just, and resilient urban-rural local food production. *Journal of Cleaner Production* 292, 126015. doi: 10.1016/j.jclepro.2021.126015
- Diekmann, M. (2020). Community Supported Agriculture - Innovative Nischenstrategie für landwirtschaftliche Betriebe? *Berichte über Landwirtschaft*, 1–21.
- Espelt, R. (2020). Agroecology prosumption: The role of CSA networks. *Journal of Rural Studies* 79, 269–275. doi: 10.1016/j.jrurstud.2020.08.032
- Farmer, J. R., Chancellor, C., Robinson, J. M., West, S., and Weddell, M. (2014). Agrileisure. *Journal of Leisure Research* 46, 313–328. doi: 10.1080/00222216.2014.11950328

- Fremstad, A., and Paul, M. (2020). Opening the Farm Gate to Women? The Gender Gap in U.S. Agriculture. *Journal of Economic Issues* 54, 124–141. doi: 10.1080/00213624.2020.1720569
- Galt, R. E., O'Sullivan, L., Beckett, J., and Hiner, C. C. (2012). Community Supported Agriculture is thriving in the Central Valley. *Cal Ag* 66, 8–14. doi: 10.3733/ca.v066n01p8
- Galt, R. E., van Soelen Kim, J., Munden-Dixon, K., Christensen, L. O., and Bradley, K. (2019). Retaining Members of Community Supported Agriculture (CSA) in California for Economic Sustainability: What Characteristics Affect Retention Rates? *Sustainability* 11, 2489. doi: 10.3390/su11092489
- Gugerell, C., Sato, T., Hvitsand, C., Toriyama, D., Suzuki, N., and Penker, M. (2021). Know the Farmer That Feeds You: A Cross-Country Analysis of Spatial-Relational Proximities and the Attractiveness of Community Supported Agriculture. *Agriculture* 11, 1006. doi: 10.3390/agriculture11101006
- Guthman, J., Morris, A. W., and Allen, P. (2006). Squaring Farm Security and Food Security in Two Types of Alternative Food Institutions\*. *Rural Sociology* 71, 662–684. doi: 10.1526/003601106781262034
- Hardesty, S. D., and Leff, P. (2010). Determining marketing costs and returns in alternative marketing channels. *Renew. Agric. Food Syst.* 25, 24–34. doi: 10.1017/S1742170509990196
- Hunter, E., Norrman, A., and Berg, E. (2022). Quantifying differences in alternative food network supply chain activities and their relationship with socio-economic outcomes. *International Food and Agribusiness Management Review* 25, 83–101. doi: 10.22434/IFAMR2020.0193
- Izumi, B. T., Higgins, C. E., Baron, A., Ness, S. J., Allan, B., Barth, E. T., et al. (2018). Feasibility of Using a Community-Supported Agriculture Program to Increase Access to and Intake of Vegetables among Federally Qualified Health Center Patients. *J Nutr Educ Behav* 50, 289-296. doi: 10.1016/j.jneb.2017.09.016
- Jablonski, B. B. R., Sullins, M., and Thilmany McFadden, D. (2019). Community-Supported Agriculture Marketing Performance: Results from Pilot Market Channel Assessments in Colorado. *Sustainability* 11, 2950. doi: 10.3390/su11102950
- Jilcott Pitts, S. B., Volpe, L. C., Sitaker, M., Belarmino, E. H., Sealey, A., Wang, W., et al. (2022). Offsetting the cost of community-supported agriculture (CSA) for low-income families: perceptions and experiences of CSA farmers and members. *Renew. Agric. Food Syst.* 37, 206–216. doi: 10.1017/S1742170521000466
- Lang, K. B. (2005). Expanding Our Understanding of Community Supported Agriculture (CSA): An Examination of Member Satisfaction. *Journal of Sustainable Agriculture* 26, 61–79. doi: 10.1300/J064v26n02\_06
- MacMillan Uribe, A. L., Winham, D. M., and Wharton, C. M. (2012). Community supported agriculture membership in Arizona. An exploratory study of food and sustainability behaviours. *Appetite* 59, 431–436. doi: 10.1016/j.appet.2012.06.002
- Matzembacher, D. E., and Meira, F. B. (2019). Sustainability as business strategy in community supported agriculture. *BFJ* 121, 616–632. doi: 10.1108/BFJ-03-2018-0207

- Medici, M., Canavari, M., and Castellini, A. (2021). Exploring the economic, social, and environmental dimensions of community-supported agriculture in Italy. *Journal of Cleaner Production* 316, 128233.
- Mert-Cakal, T., and Miele, M. (2020). 'Workable utopias' for social change through inclusion and empowerment? Community supported agriculture (CSA) in Wales as social innovation. *Agric Hum Values* 37, 1241–1260. doi: 10.1007/s10460-020-10141-6
- Mills, S., Furness, E., Clear, A. K., Finnigan, S. M., Meador, E., Milne, A. E., et al. (2021). The role of community-supported agriculture in building health and sustainability into UK diets: a mixed methods study. *The Lancet* 398, S68. doi: 10.1016/S0140-6736(21)02611-8
- Moellers, J., and Bîrhală, B. (2014). Community Supported Agriculture: A promising pathway for small family farms in Eastern Europe? A case study from Romania. *Appl Agric Forestry Res*, 139–150.
- Morgan, E., Severs, M., Hanson, K., McGuirt, J., Becot, F., Wang, W., et al. (2018). Gaining and Maintaining a Competitive Edge: Evidence from CSA Members and Farmers on Local Food Marketing Strategies. *Sustainability* 10, 2177. doi: 10.3390/su10072177
- Obach, B. K., and Tobin, K. (2014). Civic agriculture and community engagement. *Agric Hum Values* 31, 307–322. doi: 10.1007/s10460-013-9477-z
- Paul, M. (2019). Community-supported agriculture in the United States: Social, ecological, and economic benefits to farming. *Journal of Agrarian Change* 19, 162–180. doi: 10.1111/joac.12280
- Pérez-Neira, D., and Grollmus-Venegas, A. (2018). Life-cycle energy assessment and carbon footprint of peri-urban horticulture. A comparative case study of local food systems in Spain. *Landscape and Urban Planning* 172, 60–68. doi: 10.1016/j.landurbplan.2018.01.001
- Rossi, J., Woods, T., and Allen, J. (2017). Impacts of a Community Supported Agriculture (CSA) Voucher Program on Food Lifestyle Behaviors: Evidence from an Employer-Sponsored Pilot Program. *Sustainability* 9, 1543. doi: 10.3390/su9091543
- Russell, W. S., and Zepeda, L. (2008). The adaptive consumer: shifting attitudes, behavior change and CSA membership renewal. *Renew. Agric. Food Syst.* 23, 136–148. doi: 10.1017/S1742170507001962
- Samoggia, A., Perazzolo, C., Kocsis, P., and Del Prete, M. (2019). Community Supported Agriculture Farmers' Perceptions of Management Benefits and Drawbacks. *Sustainability* 11, 3262. doi: 10.3390/su11123262
- Sitaker, M., McGuirt, J., Wang, W., Kolodinsky, J., and Seguin, R. (2019). Spatial Considerations for Implementing Two Direct-to-Consumer Food Models in Two States. *Sustainability* 11, 2081. doi: 10.3390/su11072081
- Vassalos, M., Gao, Z., and Zhang, L. (2017). Factors Affecting Current and Future CSA Participation. *Sustainability* 9, 478. doi: 10.3390/su9030478
- White, M. J., Jilcott Pitts, S. B., McGuirt, J. T., Hanson, K. L., Morgan, E. H., Kolodinsky, J., et al. (2018). The perceived influence of cost-offset community-supported agriculture on food access among low-income families. *Public Health Nutr* 21, 2866–2874. doi: 10.1017/S1368980018001751

Wilkins, J. L., Farrell, T. J., and Rangarajan, A. (2015). Linking vegetable preferences, health and local food systems through community-supported agriculture. *Public Health Nutr* 18, 2392–2401. doi: 10.1017/S1368980015000713

Zhen, H., Gao, W., Jia, L., Qiao, Y., and Ju, X. (2020). Environmental and economic life cycle assessment of alternative greenhouse vegetable production farms in peri-urban Beijing, China. *Journal of Cleaner Production* 269, 122380. doi: 10.1016/j.jclepro.2020.122380
